# Supplementary material for: N-Terminal Ubiquitination of Amyloidogenic Proteins Triggers Removal of Their Oligomers by the Proteasome Holoenzyme
Source: PubMed Central journal article supplement (PMC6990400; doi:10.1016/j.jmb.2019.08.021), 2020-01-17
Supplement: mmc1.pdf [file mmc1.pdf]

# Supplementary Figure 1

**a**

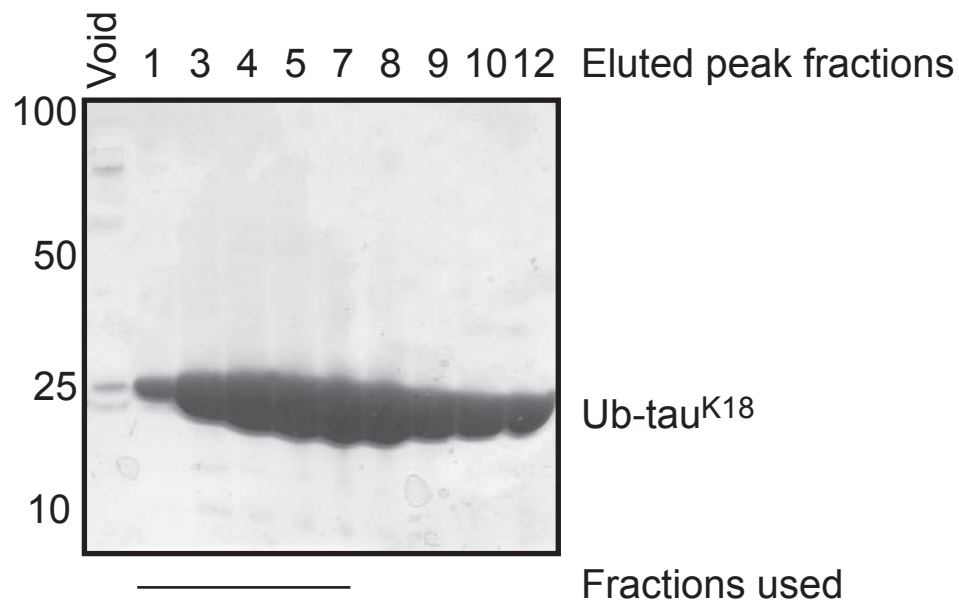

**b**

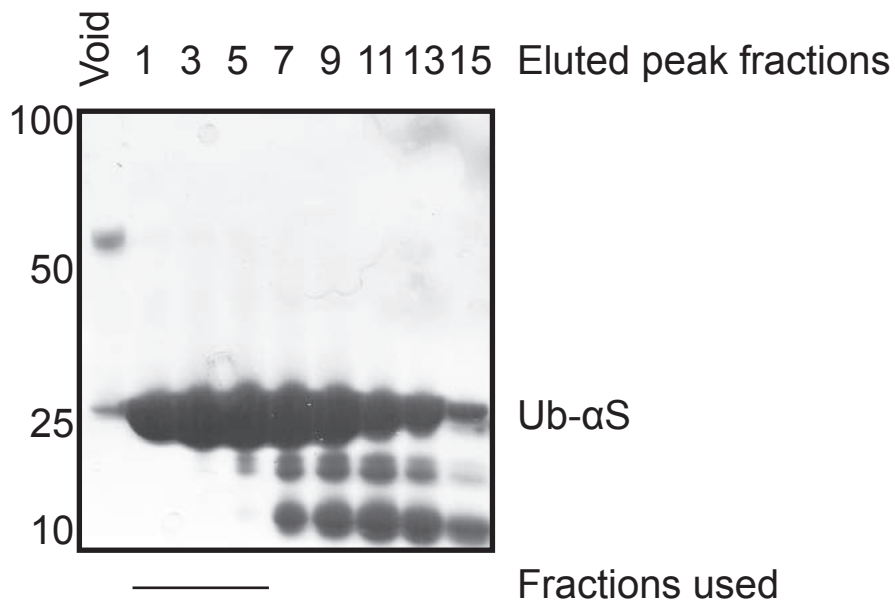

# Supplementary Figure 2

**a**

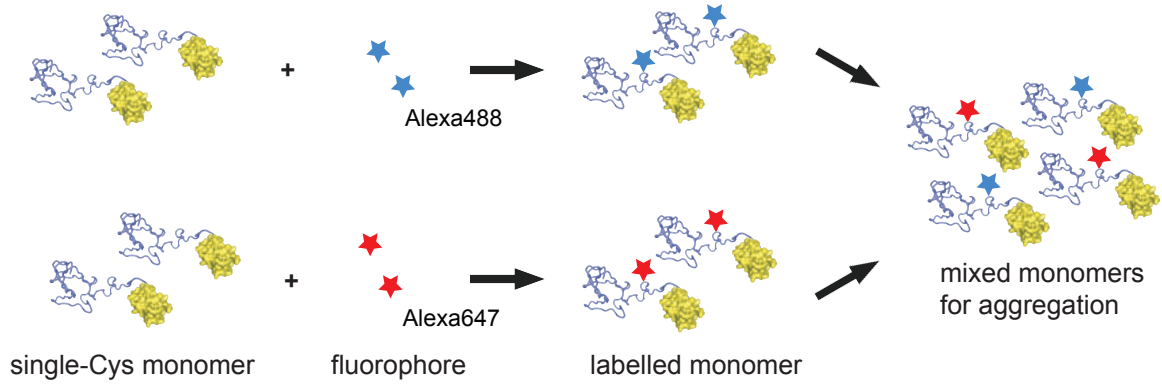

**b**

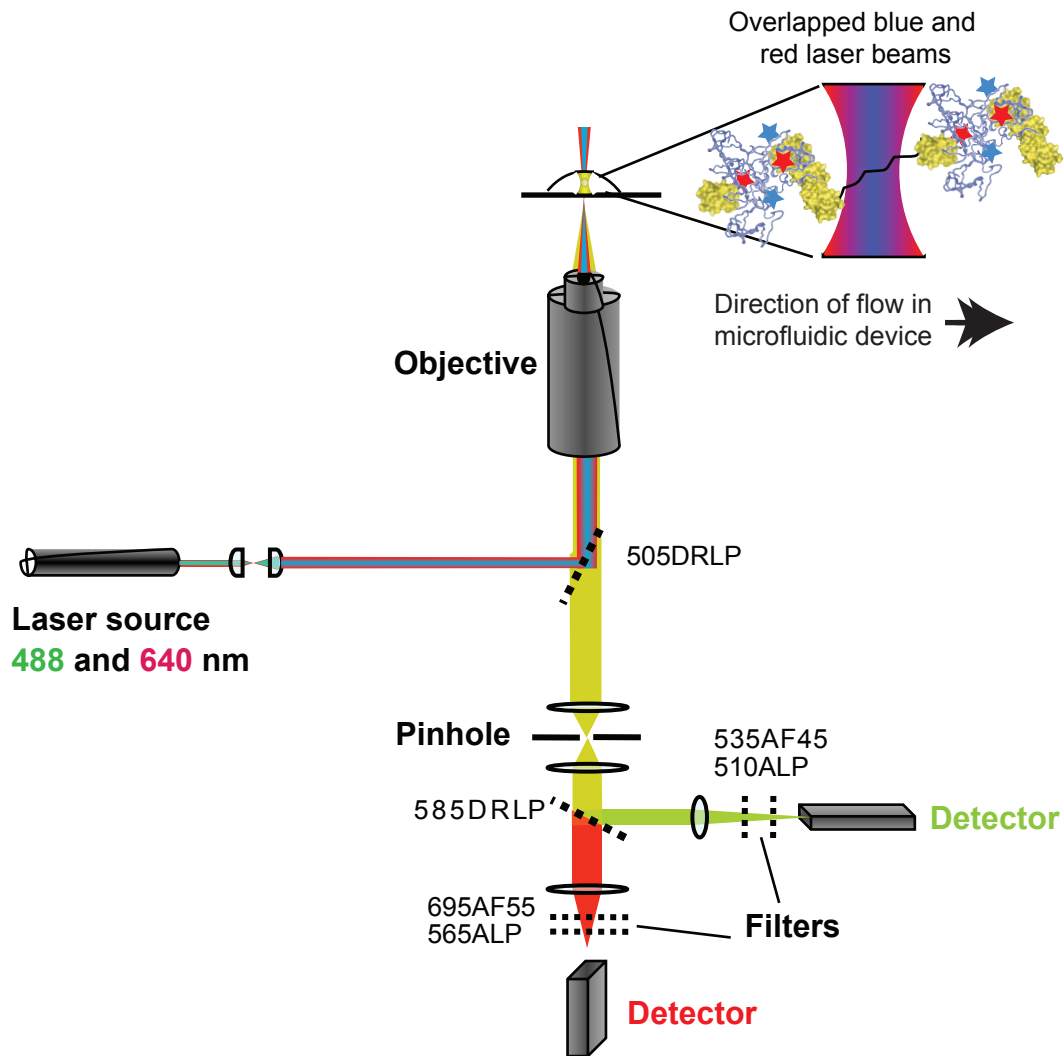

# Supplementary Figure 3

**a**

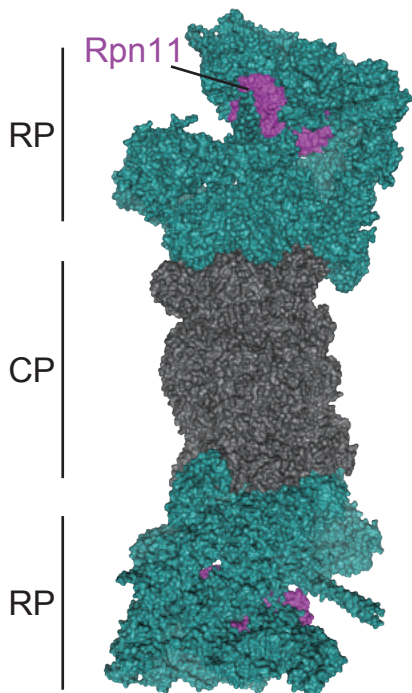

**b**

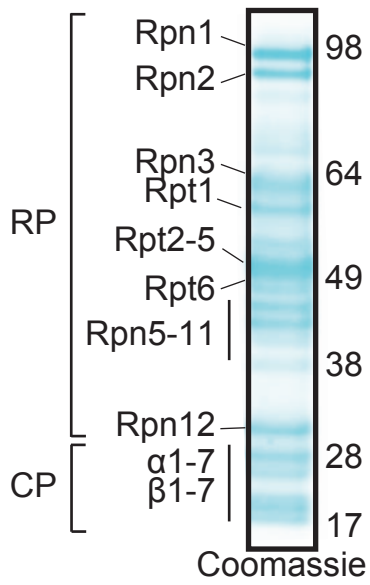

**c**

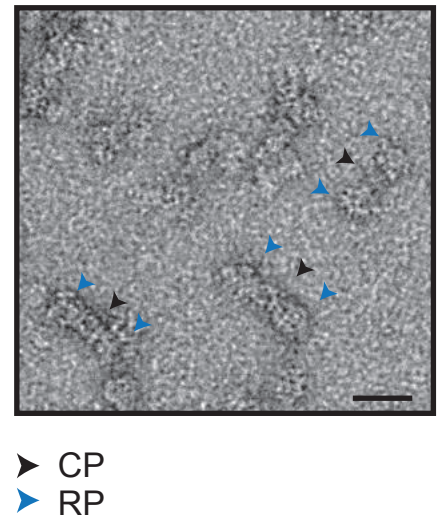

**d**

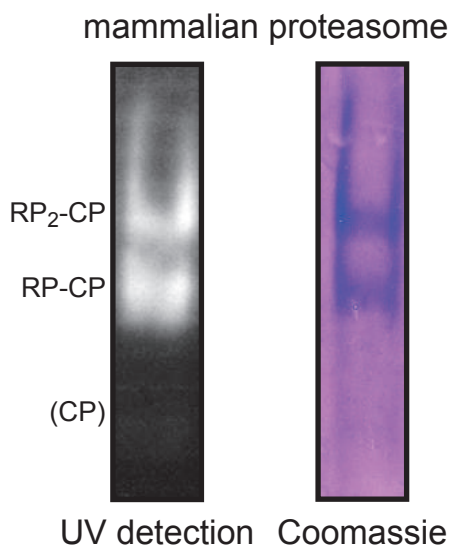

**e**

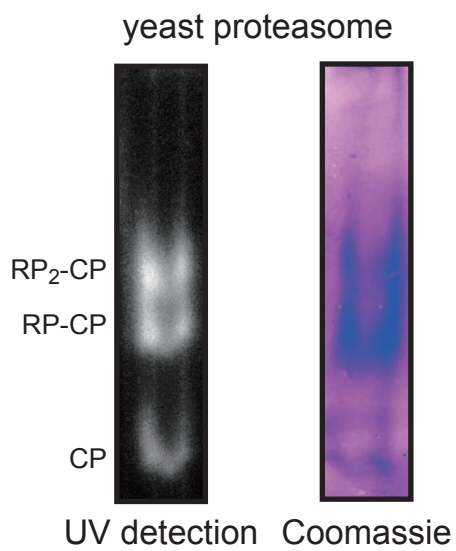

# Supplementary Figure 4

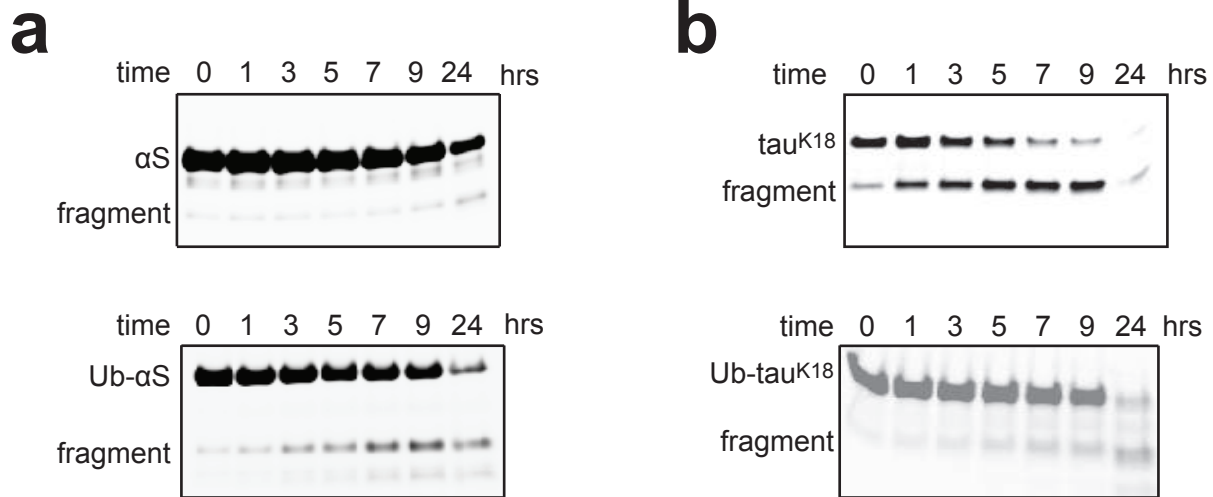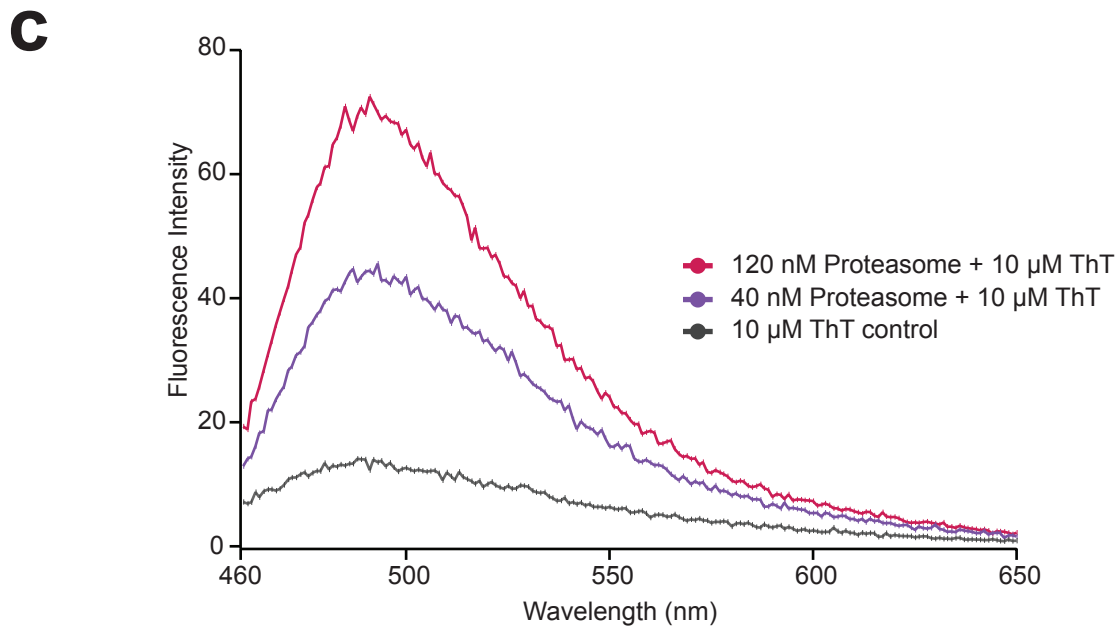

# Supplementary Figure 5

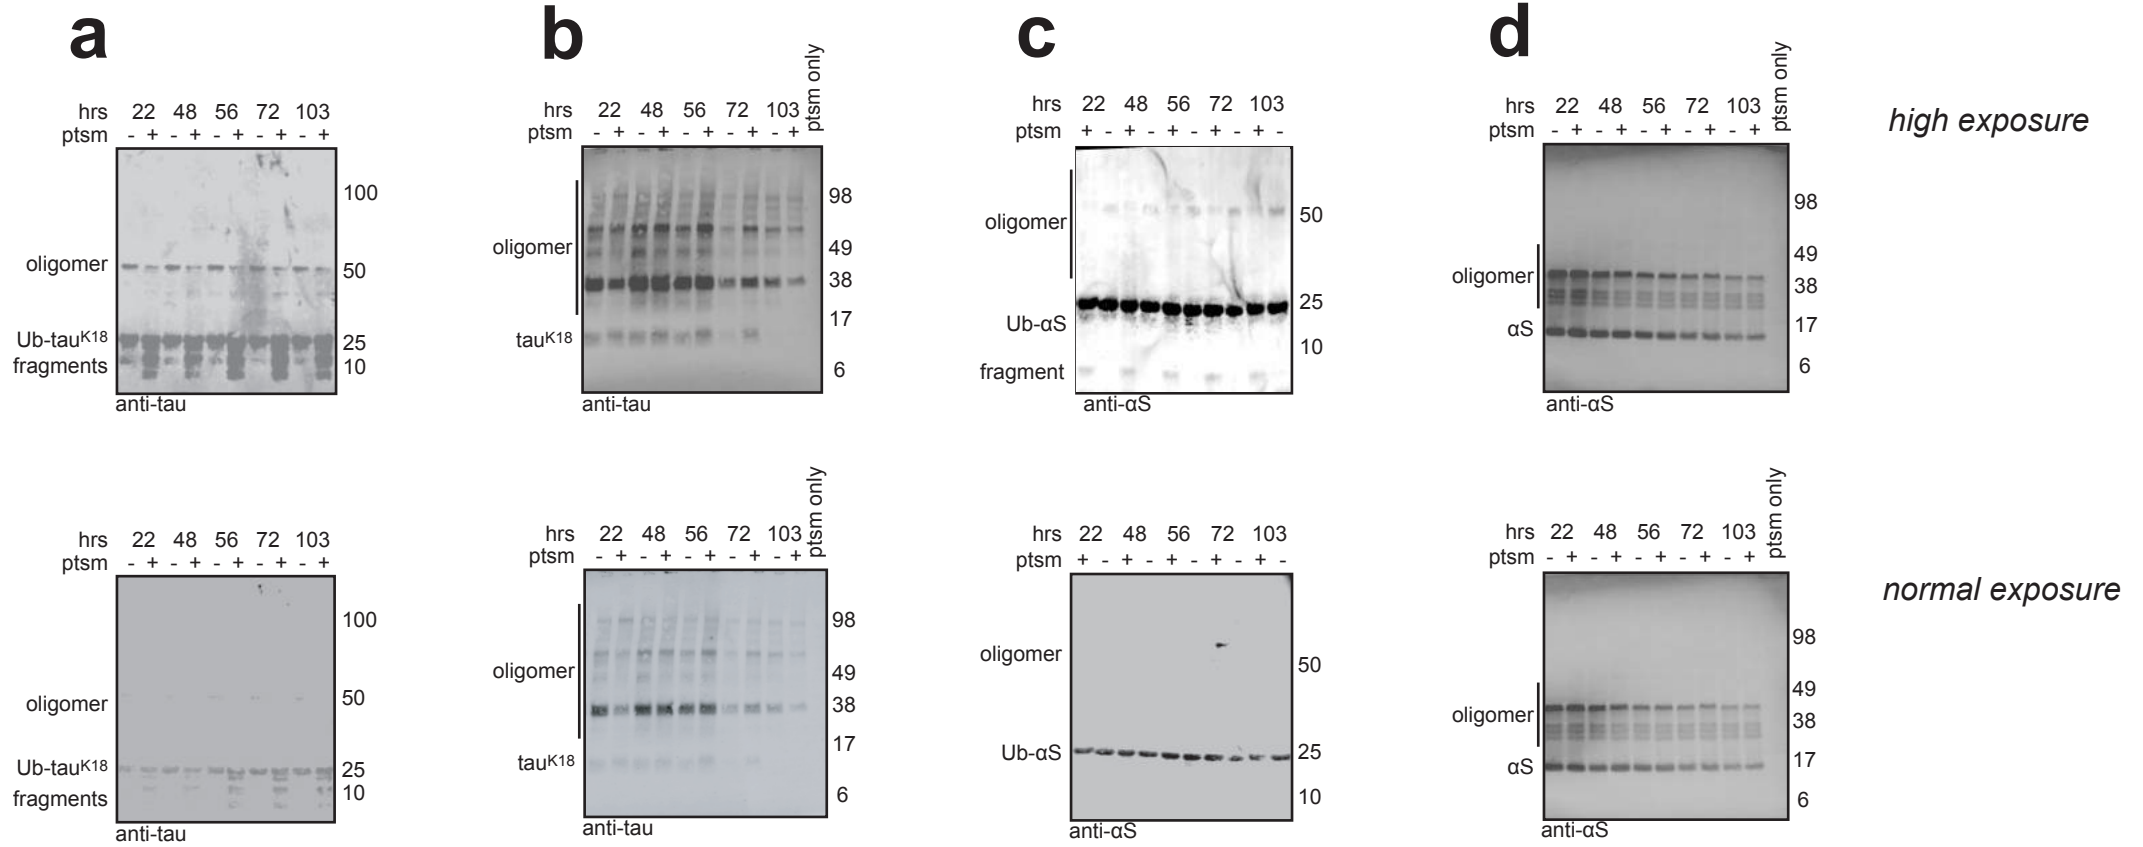

# Supplementary Table 1

## a Size dependency of Ub-tau<sup>K18</sup> aggregates removed by the proteasome

| Aggregates | 4 hrs aggregation |             |             | 24 hrs aggregation |             |            | 48 hrs aggregation |             |            | 72 hrs aggregation |             |            | 96 hrs aggregation |             |             |
|------------|-------------------|-------------|-------------|--------------------|-------------|------------|--------------------|-------------|------------|--------------------|-------------|------------|--------------------|-------------|-------------|
|            | Control           | +Proteasome | degraded    | Control            | +Proteasome | degraded   | Control            | +Proteasome | degraded   | Control            | +Proteasome | degraded   | Control            | +Proteasome | degraded    |
| Small      | 1023              | 57          | <b>94%</b>  | 9284               | 519         | <b>94%</b> | 5234               | 292         | <b>94%</b> | 2624               | 1542        | <b>41%</b> | 272                | 94          | <b>65%</b>  |
| Medium     | 24                | 0           | <b>100%</b> | 456                | 36          | <b>92%</b> | 374                | 16          | <b>96%</b> | 224                | 116         | <b>48%</b> | 4                  | 4           | <b>0%</b>   |
| Large      | 6                 | 0           | <b>100%</b> | 62                 | 6           | <b>90%</b> | 62                 | 10          | <b>84%</b> | 32                 | 18          | <b>44%</b> | 2                  | 0           | <b>100%</b> |

## b Size dependency of Ub- $\alpha$ S aggregates removed by the proteasome

| Aggregates | 4 hrs aggregation |             |             | 24 hrs aggregation |             |             | 48 hrs aggregation |             |            | 72 hrs aggregation |             |             | 96 hrs aggregation |             |            |
|------------|-------------------|-------------|-------------|--------------------|-------------|-------------|--------------------|-------------|------------|--------------------|-------------|-------------|--------------------|-------------|------------|
|            | Control           | +Proteasome | degraded    | Control            | +Proteasome | degraded    | Control            | +Proteasome | degraded   | Control            | +Proteasome | degraded    | Control            | +Proteasome | degraded   |
| Small      | 6230              | 1512        | <b>76%</b>  | 2898               | 652         | <b>78%</b>  | 2120               | 812         | <b>62%</b> | 1677               | 912         | <b>46%</b>  | 3474               | 1765        | <b>49%</b> |
| Medium     | 242               | 70          | <b>71%</b>  | 30                 | 8           | <b>73%</b>  | 38                 | 24          | <b>37%</b> | 54                 | 34          | <b>37%</b>  | 238                | 86          | <b>64%</b> |
| Large      | 8                 | 0           | <b>100%</b> | 2                  | 0           | <b>100%</b> | 0                  | 4           | <b>N/A</b> | 6                  | 0           | <b>100%</b> | 14                 | 24          | <b>N/A</b> |
